# Supplementary material for: Cardiovascular outcome of Glucagon-Like Peptide-1 Receptor Agonists vs Dipeptidyl Peptidase-4 Inhibitor on End-stage Renal Disease patients with Heart Failure: An Emulated Target Trial in Patients with Diabetes
Source: Research Square preprint supplement (doi:10.21203/rs.3.rs-7722921/v1), 2025-10-15
Supplement: Supplementary file 1 [file cca386495ea11a4f4cb78117.docx]

Content:

**Supplementary Table 1. Emulated target trial framework**

**Supplement Table 2. Demographic, visit, diagnostic, procedure, medication, and laboratory codes used in the definition of the cohorts**

**Supplementary Table 3. Demographic, diagnostic, procedure, medication, and laboratory codes used in the definition of covariates**

**Supplementary Table 4. Distribution of GLP-1 receptor agonist use among study participants**

**Supplementary Table 5. Diagnostic and laboratory codes used in the definition of outcomes**

**Supplementary Table 6. Results from multivariable cox proportional hazards model**

**Supplementary Table 7. Comparative temporal change of mean levels of glycated hemoglobin and body mass index between GLP-1 RAs and DPP4i groups**

**Supplementary Table 8. Population with dialysis related code or kidney transplant code**

**Supplementary Table 9. Sensitivity analysis with population with dependence on renal dialysis code**

**Supplementary Table 10.** **Sensitivity analysis with population without kidney transplant after index day**

**Supplementary Table 11. Sensitivity analysis after exclusion of treatment switchers to simulated a per-protocol effect**

**Supplementary Table 12. Sensitivity analysis among extended population with prevalent heart failure (any diagnosis of heart failure before ESRD)**

**Supplementary Table 13. Sensitivity Analysis for composite ischemic cardiovascular, heart failure exacerbation events and all-cause mortality**

**Supplementary Table 14. Sensitivity analysis with varying the time window for treatment initiation**

**Supplementary Table 15. Positive and negative control outcomes between the glucagon-like peptide 1 receptor agonists users compared to dipeptidyl peptidase-4 inhibitor users**

**Supplementary Table 16.** **Results in the Overall (Unmatched) Cohort**

**Supplementary Figure 1. Study design and cohort definition based on the temporal sequence of heart failure and ESRD diagnoses**

**Supplementary Figure 2. Subgroup analysis of all-cause mortality**

**Supplementary Figure 3. Subgroup analysis of composite ischemic cardiovascular, heart failure exacerbation events and all-cause mortality (competing risk analysis)**

**Supplementary Table 1.** Emulated target trial framework

| **Protocol Component** | **Target Trial** | **Emulated Trial** |
| --- | --- | --- |
| **Aim** | To compare the risk of ischemic cardiovascular, heart failure exacerbation events among patient with heart failure in ESRD initiating GLP‑1 Receptor Agonists versus DPP‑4 Inhibitors | Same as the target trial. |
| **Eligibility Criteria** | Inclusion criteria:  (1) Adults ≥18 years at randomization.  (2) ESRDon maintenance dialysis before randomization.  (3) Documented diagnosis of heart failure confirmed by echocardiography or prior hospitalization.  Exclusion criteria:  (1) Exposure to GLP-1RA or DPP-4i before randomization.  (2) Had received kidney transplant before randomization.  (3) Had experienced acute myocardial infarction, stroke, cardiac arrest, heart failure exacerbation in a stabilization window (90 days) before randomization. | Inclusion criteria:  (1) Adults ≥18 years at index day. (i.e., the first prescription date of exposure medication).  (2) ESRDdiagnosis by ICD-10-CM N18.6 codes, with additional sensitivity analysis restricted to Z99.2 (dependence on dialysis).  (3) Documented heart failure (ICD-10-CM I50.x) including systolic HF (I50.2) as code-based proxy for HFrEF/HFmrEF (LVEF ≤50%) and diastolic HF (I50.3) as code-based proxy for HFpEF (LVEF>50%).  (4) Initiation of GLP-1RA or DPP-4 inhibitors within 2 years after the first ESRD and HF diagnoses, in order to reduce heterogeneity related to disease chronicity and to approximate a more uniform baseline risk profile.  Exclusion criteria:  Same as the target trial. Additionally, those who initiated GLP-1RA and DPP-4i on the same day were excluded.  GLP-1 receptor agonists (ATC A10BJ) and DPP-4 inhibitors (ATC A10BH) were identified using Anatomical Therapeutic Chemical codes. Kidney transplantation was identified by ICD-10-CM Z94.0. Heart failure exacerbation was defined as acute on chronic systolic heart failure (I50.23), acute on chronic diastolic heart failure (I50.33), or pulmonary edema (J81). Acute myocardial infarction (AMI) was defined as acute myocardial infarction (I21), subsequent STEMI/NSTEMI myocardial infarction (I22), or acute ischemic heart disease, unspecified (I24.9). Stroke was defined as cerebral infarction (I63) or cerebral ischemia (I67.82). Cardiac arrest was defined as ICD-10-CM I46. |
| **Treatment Strategies** | 1. Initiate GLP-1 RA and continue to use through the follow-up period (defined below), unless otherwise clinically indicated. 2. Initiate DPP‑4 Inhibitors and continue to use through the follow-up period (defined below), unless otherwise clinically indicated. | Same strategies, operationalized as new-user prescription initiators of GLP-1RA or DPP-4 Inhibitors within 2 years after the first ESRD and HF diagnoses. |
| **Treatment Assignment** | Eligible patients are randomly assigned to the treatment or control groups (the same probability of treatment assignment between the groups). | Randomization was emulated using 1:1 propensity-score matching, yielding cohorts with comparable probabilities of treatment assignment. |
| **Follow-up** | Follow-up would start at randomization (Day 0) and end at the earliest of: first occurrence of the outcome of interest, death, loss to follow-up, or 2 years after randomization. | Begins 1 day after the index prescription and continues until the first outcome, loss to follow-up (last record), death, or 2 years post-index, whichever comes first. |
| **Outcomes** | 1. Primary outcome: composite ischemic cardiovascular and heart failure exacerbation events and individual cardiovascular events including acute myocardial infarction, stroke, cardiac arrest 2. Secondary outcome:   All-cause mortality, hospitalization | Same as the target trial. |
| **Causal Contrast** | 1. Primary analysis: Intention-to-treat effect(ITT). 2. Sensitivity analysis: per-protocol effect. | 1. Primary analysis: intention-to-treat effect. 2. Sensitivity analysis: per-protocol effect (excluding patients switching to the opposite treatment). |
| **Identifying assumptions** | To validly estimate the ITT effect, we assumed no losses to follow-up, and non-differential competing by deaths between groups.  To validly estimate the per-protocol effect, we additionally assumed no unmeasured important baseline or time-varying confounding during follow-up. | Due to the lack of randomized assignment, the identification of causal effects likely requires the assumption of exchangeability (comparability) conditional on baseline variables, and no informative censoring. To estimate the per-protocol effect, we additionally assumed ideal adherence of treatment.  However, to address how real-world adherence and competing risk by death may affect outcome estimate, we conducted two sensitivity analyses: (1) excluding patients switching to the other treatment group to estimate treatment effect in adherers. (2) including death in the composite outcome to address the impact of mortality. |
| **Data analysis plan** | Median follow-up time and event rates were reported. Kaplan–Meier methods were used to depict survival curves, and Cox proportional hazards regression was applied to estimate hazard ratios of outcomes. Missing data were assumed negligible under a clinical trial setting. | Same as the target trial. Control of confounding was achieved through propensity score matching. Baseline covariates with missing data were not imputed; missingness in matching protocol was handled according to the standard TriNetX protocol. For outcome events, any potential missing data were addressed through censoring. All analyses were conducted using the TriNetX platform.  Prespecified subgroup analyses were performed by sex, age (18–64 vs ≥65 years), heart failure phenotype (code-based HFpEF vs HFrEF or HFmrEF), history of cardiovascular events, use of guideline-directed medical therapy, HbA1c (≤7% vs >7%)  Sensitivity Analyses   1. To enhance the specificity of ESRD ascertainment, analyses were restricted to patients with an ICD-10-CM code for dependence on renal dialysis (Z99.2). 2. Excluded patients with kidney transplantation after index date to avoid bias from altered cardiovascular risk. 3. Extended cohort analyses including patients with prevalent HF. 4. Varied permissible windows for treatment initiation after first HF and ESRD diagnoses to test robustness to time zero definitions. 5. Expanded the composite outcome to include all-cause mortality to account for competing risks. 6. Conducted negative-control (traumatic brain injury, selected skin cancers) and positive-control (nausea) outcome analyses to assess unmeasured confounding. |

**Abbreviations:** GLP-1 RA glucagon-like peptide-1 receptor agonist, DPP4i dipeptidyl peptidase-4 inhibitor, ESRD end-stage renal disease, HFpEF heart failure with preserved ejection fraction, HFmrEF heart failure with mildly reduced ejection fraction, HFrEF heart failure with reduced ejection fraction

**Supplementary Table 2.** Demographic, visit, diagnostic, procedure, medication, and laboratory codes used in the definition of the cohorts.

| **GLP-1 RA group** | | |
| --- | --- | --- |
| **#1: At least 18 years old** | | |
| Term filters | Age | 18 years or older |
| **#2: Type 2 diabetes mellitus (specific date: 2016/08/01 - 2025/08/22)** | | |
| Diagnosis | ICD10CM:E11 | Type 2 diabetes mellitus |
| **#2.1: Heart failure (specific date: 2016/08/01 - 2025/08/22)** | | |
| Diagnosis | ICD10CM:I50 | Heart failure |
| **#2.2: End stage renal failure** **(specific date: 2016/08/01 - 2025/08/22)** | | |
| Diagnosis | ICD10CM:N18.6 | End stage renal failure |
| **#2.3: Patients with** **GLP-1 RA (#2.3 must be fulfilled within 2 years after #2.1 and #2.2)** | | |
| Medication | ATC: A10BJ | Glucagon-like peptide-1 (GLP-1) analogues |
| **Exclude prior GLP-1 RA before #2.3** | | |
| Medication | ATC: A10BJ | Glucagon-like peptide-1 (GLP-1) analogues |
| **Exclude prior DPP4i before #2.3** | | |
| Medication | ATC: A10BH | Dipeptidyl peptidase-4 inhibitor (DPP4i) |
| **DPP4i group** | | |
| **#1: At least 18 years old** | | |
| Term filters | Age | 18 years or older |
| **#2: Type 2 diabetes mellitus (specific date: 2016/08/01 - 2025/08/22)** | | |
| Diagnosis | ICD10CM:E11 | Type 2 diabetes mellitus |
| **#2.1: Heart failure (specific date: 2016/08/01 - 2025/08/22)** | | |
| Diagnosis | ICD10CM:I50 | Heart failure |
| **#2.2: End stage renal failure** **(specific date: 2016/08/01 - 2025/08/22)** | | |
| Diagnosis | ICD10CM:N18.6 | End stage renal failure |
| **#2.3: Patients with** **DPP4i (#2.3 must be fulfilled with 2 years after #2.1 and #2.2)** | | |
| Medication | ATC: A10BH | Dipeptidyl peptidase-4 inhibitor (DPP4i) |
| **Exclude prior DPP4i before #2.3** | | |
| Medication | ATC: A10BH | Dipeptidyl peptidase-4 inhibitor (DPP4i) |
| **Exclude prior GLP-1 RA before #2.3** | | |
| Medication | ATC: A10BJ | Glucagon-like peptide-1 (GLP-1) analogues |

**Abbreviations:** GLP-1 RA glucagon-like peptide-1 receptor agonist, DPP4i dipeptidyl peptidase-4 inhibitor.

**Supplementary Table 3.** Demographic, diagnostic, procedure, medication, and laboratory codes used in the definition of covariates

| **Covariates** | **Category** | **Code** |
| --- | --- | --- |
| Age at index | Demographics | AI |
| Male | Demographics | M |
| Female | Demographics | F |
| White | Demographics | 2106-3 |
| Black or African American | Demographics | 2054-5 |
| Asian | Demographics | 2028-9 |
| Other Race | Demographics | 2131-1 |
| Unknown Race | Demographics | UNK |
| Nicotine dependence | Diagnosis | ICD10CM:F17 |
| Alcohol related disorders | Diagnosis | ICD10CM:F10 |
| Overweight and obesity | Diagnosis | ICD10CM:E66 |
| Hypertension | Diagnosis | ICD10CM:I10 |
| Dyslipidemia | Diagnosis | ICD10CM:E78.5 |
| Chronic obstructive pulmonary diseases | Diagnosis | ICD10CM:J44 |
| Neoplasms | Diagnosis | ICD10CM:C00-D49 |
| liver cirrhosis | Diagnosis | ICD10CM:K74.60 |
| Systemic lupus erythematosus | Diagnosis | ICD10CM:M32 |
| Glomerular diseases | Diagnosis | ICD10CM:N00-N08 |
| HFpEF | Diagnosis | ICD10CM:I50.2 |
| HFrEF or HFmrEF | Diagnosis | ICD10CM:I50.3 |
| Combined HFpEF and HFrEF | Diagnosis | ICD10CM:I50.4 |
| Heart failure, unspecified | Diagnosis | ICD10CM:I50.9 |
| Other heart failure | Diagnosis | ICD10CM:I50.8 |
| Left ventricular failure | Diagnosis | ICD10CM:I50.1 |
| ESRD | Diagnosis | ICD10CM:N18.6 |
| Peritoneal dialysis solutions | Medication | VA:IR200 |
| Dialysis procedure other than hemodialysis | Procedure | CPT:1012757 |
| Atrial fibrillation | Diagnosis | ICD10CM:I48.91 |
| Ischemic heart disease | Diagnosis | ICD10CM:I20-I25 |
| Hypertensive heart disease | Diagnosis | ICD10CM:I11 |
| Cardiomyopathy | Diagnosis | ICD10CM:I42 |
| Chronic rheumatic heart diseases | Diagnosis | ICD10CM:I05-I09 |
| Cerebrovascular disease | Diagnosis | ICD10CM:I60-I69 |
| Peripheral vascular disease | Diagnosis | ICD10CM:I73.9 |
| Sulfonylurea | Medication | ATC: A10BB |
| Insulin | Medication | ATC: A10A |
| Aspirin | Medication | RxNorm:1191 |
| Heparin | Medication | ATC: B01AC |
| Clopidogrel | Medication | ATC: 32968 |
| Ticagrelor | Medication | ATC:1116632 |
| Prasugrel | Medication | ATC:613391 |
| Organic nitrates | Medication | ATC:C01DA |
| Antilipemic agents | Medication | ATC:CV350 |
| HMG CoA reductase inhibitors | Medication | ATC:C10AA |
| **Covariates** | **Category** | **Code** |
| Fibrates | Medication | ATC:C10AB |
| Ezetimibe | Medication | ATC:341248 |
| Nicotinic acid and derivatives | Medication | ATC:C10AD |
| ACEi | Medication | ATC:CV800 |
| ARB/ARNI | Medication | ATC:CV805 |
| Calcium channel blockers | Medication | ATC:C08 |
| Hydralazine | Medication | ATC:5470 |
| β-Blocker | Medication | ATC:C07 |
| Spironolactone | Medication | ATC:9997 |
| SGLT2i | Medication | ATC: A10BK |
| Amiodarone | Medication | ATC:703 |
| NSAID | Medication | ATC: S01BC |
| Arteriovenous fistula | Procedures | 1006752 |
| Arteriovenous graft | Procedures | 1006759 |
| Temporary hemodialysis catheter insertion | Procedures | 1006748 |
| Sodium, mmol/L | Laboratory | TNX:9029 |
| Potassium, mmol/L | Laboratory | TNX:9028 |
| Calcium, mmol/L | Laboratory | TNX:9022 |
| Phosphate, mmol/L | Laboratory | TNX:9027 |
| Iron, µg/dL, Mean | Laboratory | TNX:9043 |
| Transferrin, mg/dL | Laboratory | TNX:LG51311-5 |
| Iron binding capacity, μg/dL | Laboratory | IONIC:2500-7 |
| Parathyroid hormone,pg/mL | Laboratory | TNX:9039 |
| Ferritin, μg/dL | Laboratory | TNX:9042 |
| BUN, mg/dL | Laboratory | TNX:9030 |
| BMI | Laboratory | TNX:9083 |
| SBP | Laboratory | TNX:9085 |
| HBA1C | Laboratory | TNX:9037 |
| Albumin | Laboratory | TNX:9045 |
| Hemoglobin | Laboratory | TNX:9014 |
| LDL, cholesterol | Laboratory | TNX:9002 |
| LVEF, % | Laboratory | TNX:2003 |
| Natriuretic peptide B, pg/mL | Laboratory | TNX:9003 |
| Natriuretic peptide.B prohormone N-Terminal, pg/mL | Laboratory | TNX:9072 |

**Abbreviations**: ESRD end stage renal disease, HFpEF heart failure with preserved ejection fraction, HFrEF heart failure with reduced ejection fraction, HFmrEF heart failure with mildly reduced ejection fraction, ACEi angiotensin-converting enzyme inhibitor, ARB angiotensin receptor blocker, ARNI angiotensin receptor-neprilysin inhibitor, NSAID non-steroidal anti-inflammatory drug, LDL low-density lipoprotein, BUN blood urea nitrogen, BMI body mass index

# Supplementary Table 4. Distribution of GLP-1 receptor agonist use among study participants

| GLP‑1 receptor agonists | Events, n (%) |
| --- | --- |
| Semaglutide(any) | 887(56.5%) |
| Semaglutide inject | 611(39%) |
| Semaglutide oral | 105 (6.7%) |
| Semaglutide unkown route | 303(19.3%) |
| Dulaglutide | 685(43.6%) |
| Liraglutide | 321(20.4%) |
| Exenatide | 38(2.4%) |
| Lixisenatide | 45(2.9%) |

Abbreviations: GLP-1 RA glucagon-like peptide-1 receptor agonist

**Supplementary Table 5.** Diagnostic and laboratory codes used in the definition of outcomes

| **Outcomes** | **Category** | **Code** | **Description** |
| --- | --- | --- | --- |
| 1. **Primary outcome** | | | |
| Composite of ischemic and heart failure exacerbation events | Diagnosis | ICD10CM:I50.23 | Acute on chronic systolic (congestive) heart failure |
| Diagnosis | ICD10CM:I50.33 | Acute on chronic diastolic (congestive) heart failure |
| Diagnosis | ICD10CM:J81 | Pulmonary edema |
| Diagnosis | ICD10CM:I63 | Cerebral infarction |
| Diagnosis | ICD10CM:I67.82 | Cerebral ischemia |
| Diagnosis | ICD10CM:I46 | Cardiac arrest |
| Diagnosis | ICD10CM:I21 | Acute myocardial infarction |
| Diagnosis | ICD10CM:I22 | Subsequent ST elevation (STEMI) and non-ST elevation (NSTEMI) myocardial infarction |
| Diagnosis | ICD10CM:I24.9 | Acute ischemic heart disease, unspecified |
| Heart failure exacerbation | Diagnosis | ICD10CM:I50.23 | Acute on chronic systolic (congestive) heart failure |
| Diagnosis | ICD10CM:I50.33 | Acute on chronic diastolic (congestive) heart failure |
| Diagnosis | ICD10CM:J81 | Pulmonary edema |
| Ischemic cardiovascular events | Diagnosis | ICD10CM:I63 | Cerebral infarction |
| Diagnosis | ICD10CM:I67.82 | Cerebral ischemia |
| Diagnosis | ICD10CM:I46 | Cardiac arrest |
| Diagnosis | ICD10CM:I21 | Acute myocardial infarction |
| Diagnosis | ICD10CM:I22 | Subsequent ST elevation (STEMI) and non-ST elevation (NSTEMI) myocardial infarction |
| Diagnosis | ICD10CM:I24.9 | Acute ischemic heart disease, unspecified |
| Acute myocardial infarction | Diagnosis | ICD10CM:I21 | Acute myocardial infarction |
| Diagnosis | ICD10CM:I22 | Subsequent ST elevation (STEMI) and non-ST elevation (NSTEMI) myocardial infarction |
| Diagnosis | ICD10CM:I24.9 | Acute ischemic heart disease, unspecified |
| Stroke | Diagnosis | ICD10CM:I63 | Cerebral infarction |
| Diagnosis | ICD10CM:I67.82 | Cerebral ischemia |
| Cardiac arrest | Diagnosis | ICD10CM:I46 | Cardiac arrest |
| 1. **Secondary outcome** | | | |
| Mortality | Demographics | Deceased | Deceased |
| Diagnosis | ICD10CM:R99 | Ill-defined and unknown cause of mortality |
| Hospitalization | Visit | HL7V3.0:VisitType:ACUTE | Visit: Inpatient Acute |
| Visit | HL7V3.0:VisitType:IMP | Visit: Inpatient Encounter |
| Visit | HL7V3.0:VisitType:NONAC | Visit: Inpatient Non-acute |
| Visit | HL7V3.0:VisitType:EMER | Visit: Emergency |
| Visit | HL7V3.0:VisitType:SS | Visit: Short Stay |
| Visit | HL7V3.0:VisitType:OBSENC | Visit: Observation Encounter |
| Visit | HL7V3.0:VisitType:ACUTE | Visit: Inpatient Acute |
| 1. **Positive and negative outcome** | | | |
| Traumatic intracranial injury | Diagnosis | ICD10CM:S06 | Intracranial injury |
| Melanoma | Diagnosis | ICD10CM:C33-34 | Melanoma and other malignant neoplasms of skin |
| Nausea | Diagnosis | ICD10CM:R11.0 | Nausea |

# Supplementary Table 6. Results from multivariable cox proportional hazards model

| Outcome | Adjust Hazard Ratio (95% CI) | *p* value |
| --- | --- | --- |
| Composite of ischemic cardiovascular outcome and heart failure exacerbation events | 0.761(0.68-0.852) | <0.0001 |
| Ischemic cardiovascular outcome | 0.764(0.661-0.884) | 0.0003 |
| Heart failure exacerbation | 0.766(0.668-0.878) | 0.0001 |
| All-cause mortality | 0.69(0.58-0.82) | <0.0001 |
| Hospitalization | 0.764(0.704-0.83) | <0.0001 |

Abbreviations: CI confidence interval

Notes: The Cox proportional hazards models were fully adjusted for **baseline demographics** (age at index [years, mean (SD)], sex [female or male], and race [White, Black or African American, Asian, other, or unknown]); **comorbidities** (diagnosis of heart failure [HFpEF, HFrEF or HFmrEF, combined HFpEF and HFrEF, unspecified HF, other HF, and left ventricular failure], dialysis profile [end-stage renal disease, peritoneal dialysis, dialysis procedures other than hemodialysis, types of hemodialysis access including arteriovenous fistula, arteriovenous graft, or temporary hemodialysis catheter insertion], cardiovascular diseases [ischemic heart diseases, hypertensive heart disease, cardiomyopathy, chronic rheumatic heart diseases, atrial fibrillation, cerebrovascular diseases, and peripheral vascular disease], alcohol-related disorders, nicotine dependence, hypertension, dyslipidemia, overweight and obesity, chronic obstructive pulmonary diseases, neoplasms, liver cirrhosis, systemic lupus erythematosus, and glomerular diseases); **physical examination** (body mass index [BMI, kg/m², mean (SD); categorized as ≤18.5, 18.5–25, 25–30, 30–35, 35–40, and ≥40]); **laboratory examinations** (left ventricular ejection fraction [LVEF, %, mean (SD)], B-type natriuretic peptide [BNP, pg/mL, mean (SD); categorized as ≤100, 100–300, 300–600, and ≥600], N-terminal prohormone BNP [pg/mL, mean (SD); categorized as ≤400, 400–800, 800–1200, 1200–70000, and ≥70000], sodium [mmol/L], potassium [mmol/L], calcium [mmol/L], phosphate [mmol/L], hemoglobin [g/dL], iron [µg/dL], transferrin [mg/dL], iron-binding capacity [µg/dL], parathyroid hormone [pg/mL], ferritin [µg/dL; categorized as ≤100, 100–200, and ≥200], albumin [g/dL], blood urea nitrogen [BUN, mg/dL], systolic blood pressure [mmHg], glycated hemoglobin [HbA1c, %, mean (SD); categorized as 5–6.5, 6.5–7.5, 7.5–12, and ≥12], and low-density lipoprotein cholesterol [LDL-C, mg/dL, mean (SD); categorized as ≤55, 55–70, 70–100, 100–130, 130–160, and ≥160]); and **medications**, including heart failure guideline-directed medical therapy (beta-blockers, angiotensin-converting enzyme inhibitors [ACEi], angiotensin receptor blockers [ARB] or angiotensin receptor–neprilysin inhibitors [ARNI], spironolactone, and sodium–glucose cotransporter-2 inhibitors [SGLT2i]); cardiovascular agents (aspirin, heparin, clopidogrel, ticagrelor, prasugrel, organic nitrates, digoxin, and amiodarone); antihypertensive drugs (calcium channel blockers and hydralazine); antidiabetic drugs (sulfonylureas and insulin or analogues); lipid-lowering agents (antilipemic agents, HMG-CoA reductase inhibitors, fibrates, ezetimibe, and nicotinic acid or derivatives); and non-steroidal anti-inflammatory drugs (NSAIDs).

**Supplementary Table 7.** Comparative temporal change of mean levels of glycated hemoglobin and body mass index between GLP-1 RAs and DPP4i groups

| Time duration | Glycated hemoglobin, mean (SD), % | | | BMI, mean (SD), kg/m² | | |
| --- | --- | --- | --- | --- | --- | --- |
| GLP-1 RA | DPP4i | *p* value | GLP-1 RA | DPP4i | *p* value |
| Baseline | 7.9 (2.2) | 7.6 (1.9) |  | 33.5 (7.8) | 32.5 (7.5) |  |
| 0-6 months | 7.4 (1.8) | 7.3 (1.8) | 0.61 | 32.9 (8.2) | 31.6 (7.6) | 0.85 |
| 6-12 months | 7.4 (1.8) | 7.1 (1.6) | 1.00 | 32.6 (7.9) | 31.1 (7.4) | 0.74 |
| 12-18 months | 7.4 (1.8) | 7.3 (2.0) | 0.61 | 32.7 (8.1) | 31.5 (7.2) | 0.90 |
| 18-24 months | 7.4 (1.8) | 7.3 (1.8) | 1.00 | 32.7 (7.9) | 31.7 (7.5) | 1.00 |

Abbreviations: BMI body mass index, DPP-4i dipeptidyl peptidase-4 inhibitor, GLP-1 RA glucagon-like peptide-1 receptor agonist, HbA1c glycated hemoglobin

Note: Between-group differences in mean changes from baseline were compared using independent two-sample t-tests, with standard errors estimated from group-level means and standard deviations.

# Supplementary Table 8. Population with dialysis related code or kidney transplant code

|  | GLP‑1 receptor agonists | DPP-4 inhibitor |
| --- | --- | --- |
| Diagnose code | Events, n (%) | Events, n (%) |
| Depend on renal dialysis† | 1096 (70%) | 2169(62%) |
| Dialysis related code‡ | 1032(68%) | 2434(69%) |
| Composite of depend on renal dialysis and dialysis related code†‡ | 1330(87.7%) | 2817(80%) |
| Kidney transplant status after index day§ | 115(7.5%) | 416 (11.8%) |

Note:

† Depend on renal dialysis ICD10CM:Z99.2

‡ Dialysis related code: Dialysis services and procedures CPT: 1012748; Dialysis procedure other than hemodialysis (e.g., peritoneal dialysis, hemofiltration, or other continuous renal replacement therapies) CPT: 90945, 90947, 99945

(single or repeated evaluation by a physician or other qualified health care professional); Dialysis circuit procedures

CPT: 1829674,; Dialysis procedure SNOMED: 108241081, Hemodialysis SNOMED: 382497986, ICD-9-CM: 39.95; Hemodialysis procedures CPT: 1812752, 90935; Hemodialysis access, intervascular cannulation for extracorporeal circulation, or shunt insertion procedures on arteries and veins CPT: 1866747; Catheter, hemodialysis/peritoneal

HCPCS: C1758 (long-term), C1752 (short-term); Duplex scan of hemodialysis access (including arterial inflow, body of access, and venous outflow) CPT: 93990; Duplex scan of arterial inflow and venous outflow for preoperative vessel assessment prior to creation of hemodialysis access CPT: 1835675, 93985; Complications of vascular dialysis catheter

Mechanical complication: ICD-10-CM T82.4, T82.41, T82.41XA, Other complication: ICD-10-CM T82.49, T82.49XA

Breakdown (mechanical): ICD-10-CM T82.41, T82.41XA, Displacement: ICD-10-CM T82.42, T82.42XA

;Encounter for care involving renal dialysis ICD-10-CM: Z49; Physiological systems / performance / urinary

ICD-10-PCS: 5A1D

§ Kidney transplant status (ICD10CM:Z94.0)

# Supplementary Table 9. Sensitivity analysis with population with dependence on renal dialysis code (ICD10CM:Z99.2)

| Outcome | Hazard Ratio (95% CI) | *p* value |
| --- | --- | --- |
| Composite of ischemic cardiovascular outcome and heart failure exacerbation events | 0.702(0.59-0.836) | <0.0001 |
| Ischemic cardiovascular outcome | 0.598(0.478-0.748) | <0.0001 |
| Heart failure exacerbation | 0.81(0.665-0.985) | 0.0347 |
| All-cause mortality | 0.682(0.549-0.848) | 0.0006 |

Abbreviations: CI confidence interval

**Supplementary Table 10.** Sensitivity analysis with population without kidney transplant (ICD10CM:Z94.0) after index day

| Outcome | Hazard Ratio (95% CI) | *p* value |
| --- | --- | --- |
| Composite of ischemic cardiovascular outcome and heart failure exacerbation events | 0.738(0.638-0.854) | <0.0001 |
| Ischemic cardiovascular outcome | 0.747(0.617-0.906) | 0.0029 |
| Heart failure exacerbation | 0.76(0.636-0.909) | 0.0026 |
| All-cause mortality | 0.655(0.49-0.875) | 0.0042 |

Abbreviations: CI confidence interval

# Supplementary Table 11. Sensitivity analysis after exclusion of treatment switchers to simulated a per-protocol effect

|  | GLP-1 receptor agonist | DPP-4 inhibitor | Hazard Ratio (95% CI) | *p* value | E-value(95% UCL) |
| --- | --- | --- | --- | --- | --- |
| Outcome | Events, n (%) | Events, n (%) |  |  |  |
| Primary outcome | | | | | |
| Composite ischemic cardiovascular and heart failure exacerbation events | 300/1031(29.1%) | 393/1031(38.1%) | 0.711(0.612-0.826) | <0.0001 | 2.2(1.7) |
| Heart failure acute exacerbation | 206/1031(20.0%) | 259/1031(25.1%) | 0.76(0.633-0.912) | 0.0032 | 2.0(1.4) |
| Ischemic cardiovascular events | 161/1031(15.6%) | 246/1031(23.8%) | 0.622(0.51-0.759) | <0.0001 | 2.6(2.0) |
| Secondary outcome | | | | | |
| All-cause mortality | 134/1031(13.0%) | 195/1031(18.9%) | 0.675(0.542-0.841) | 0.0004 | 2.3(1.7) |
| Hospitalization | 563/1031(54.6%) | 635/1031(61.6%) | 0.771(0.688-0.863) | <0.0001 | 1.9(1.6) |

Abbreviations: UCL upper confidence limit, CI confidence interval, DPP-4i dipeptidyl peptidase-4 inhibitor, GLP-1 RA glucagon-like peptide-1 receptor agonist

# Supplementary Table 12. Sensitivity analysis among extended population with prevalent heart failure (any diagnosis of heart failure before ESRD)

|  | GLP-1 receptor agonist | DPP-4 inhibitor | Hazard Ratio (95% CI) | *p* value |
| --- | --- | --- | --- | --- |
| Outcome | Events, n (%) | Events, n (%) |  |  |
| Composite ischemic cardiovascular and heart failure exacerbation events | 604/1859(30.6%) | 704/1859(38.6%) | 0.82(0.736-0.914) | 0.0003 |
| All-cause mortality | 246/1859(13.2%) | 329/1859(17.7%) | 0.739(0.626-0.871) | 0.0003 |
| Hospitalization | 1064/1859(57.2%) | 1184/1859(63.7%) | 0.798(0.734-0.866) | <0.0001 |

Abbreviations: UCL upper confidence limit, CI confidence interval, DPP-4i dipeptidyl peptidase-4 inhibitor, GLP-1 RA glucagon-like peptide-1 receptor agonist, ESRD end-stage renal disease

# Supplementary Table 13. Sensitivity Analysis for composite ischemic cardiovascular, heart failure exacerbation events and all-cause mortality

|  | GLP-1 receptor agonist | DPP-4 inhibitor | Hazard Ratio (95% CI) | *p* value | E-value(95% UCL) |
| --- | --- | --- | --- | --- | --- |
| Outcome | Events, n (%) | Events, n (%) |  |  |  |
| Primary outcome + all-cause mortality | 457/1257(36.3%) | 595/1257(47.3%) | 0.717(0.635-0.81) | <0.0001 | 2.1(1.8) |

Abbreviations: UCL upper confidence limit, CI confidence interval, DPP-4i dipeptidyl peptidase-4 inhibitor, GLP-1 RA glucagon-like peptide-1 receptor agonist

**Supplementary Table 14.** Sensitivity analysis with varying the time window for treatment initiation

|  | GLP-1 receptor agonist | DPP-4 inhibitor | Hazard Ratio (95% CI) | *p* value |
| --- | --- | --- | --- | --- |
| Outcome | Events, n (%) | Events, n (%) |  |  |
| HF and ESRD are diagnosed within 6 months before index day | | | | |
| Composite ischemic cardiovascular and heart failure exacerbation events | 136/500 (27.2%) | 176/500 (35.2%) | 0.746 (0.596-0.933) | 0.0093 |
| All-cause mortality | 71/500 (14.2%) | 93/500 (18.6%) | 0.777 (0.571-1.059) | 0.116 |
| Hospitalization | 273/500 (54.6%) | 302/500 (60.4%) | 0.81 (0.687-0.954) | 0.0118 |
| HF and ESRD are diagnosed within 9 months before index day | | | | |
| Composite ischemic cardiovascular and heart failure exacerbation events | 181/631 (28.6%) | 231/631 (36.6%) | 0.764(0.629-0.929) | 0.0056 |
| All-cause mortality | 78/631 (12.4%) | 98/631 (15.5%) | 0.823(0.611,1.108) | 0.21 |
| Hospitalization | 337/631 (53.4%) | 387/631 (61.3%) | 0.768(0.663-0.888) | 0.00052 |
| HF and ESRD are diagnosed within 12 months before index day | | | | |
| Composite ischemic cardiovascular and heart failure exacerbation events | 228/781 (29.2%) | 296/781 (37.9%) | 0.766(0.645-0.911) | 0.0022 |
| All-cause mortality | 98/781 (12.5%) | 158/781 (20.2%) | 0.641(0.498-0.824) | 0.0004 |
| Hospitalization | 426/781 (54.5%) | 473/781 (60.5%) | 0.831(0.729-0.948) | 0.0056 |
| HF and ESRD are diagnosed within 15 months before index day | | | | |
| Composite ischemic cardiovascular and heart failure exacerbation events | 274/921 (29.7%) | 333/921 (36.1%) | 0.784(0.668-0.92) | 0.0019 |
| All-cause mortality | 111/921 (12.0%) | 167/921 (18.1%) | 0.654(0.515-0.832) | 0.0003 |
| Hospitalization | 515/921 (55.9%) | 568/921 (61.7%) | 0.792(0.703-0.892) | 0.0001 |
| HF and ESRD are diagnosed within 18 months before index day | | | | |
| Composite ischemic cardiovascular and heart failure exacerbation events | 305/1020(29.9%) | 372/1020(36.4%) | 0.773(0.665-0.9) | 0.0008 |
| All-cause mortality | 127/1020 (12.4%) | 181/1020(17.7%) | 0.693(0.552-0.869) | 0.0007 |
| Hospitalization | 571/1020 (56.0%) | 651/1020(63.8%) | 0.728(0.651-0.815) | <0.0001 |

**Abbreviations:** GLP-1 RA glucagon-like peptide-1 receptor agonist, DPP4i dipeptidyl peptidase-4 inhibitor, ESRD end-stage renal disease, HF heart failure

# Supplement Table 15. Positive and negative control outcomes between the glucagon-like peptide 1 receptor agonists users compared to dipeptidyl peptidase-4 inhibitor users

| Outcome | Hazard Ratio (95% CI) | *p* value |
| --- | --- | --- |
| Positive outcome | | |
| Nausea | 1.459(1.078-1.976) | 0.0139 |
| Negative outcome | | |
| Skin cancer | 1.206(0.632-2.303) | 0.5690 |
| Traumatic brain injury | 1.115(0.608-2.043) | 0.7252 |

Abbreviations: CI confidence interval

**Supplementary Table 16.** Results in the Overall (Unmatched) Cohort

|  | Hazard Ratio (95% CI) | *p* value |
| --- | --- | --- |
| Composite ischemic cardiovascular and heart failure exacerbation events | 0.762 (0.683-0.851) | <0.0001 |
| Heart failure acute exacerbation | 0.779 (0.68-0.892) | 0.0003 |
| Ischemic cardiovascular events | 0.76 (0.658-0.878) | 0.0002 |
| All-cause mortality | 0.553 (0.468-0.653) | <0.0001 |
| Hospitalization | 0.763(0.704-0.827) | <0.0001 |

Abbreviations: CI confidence interval


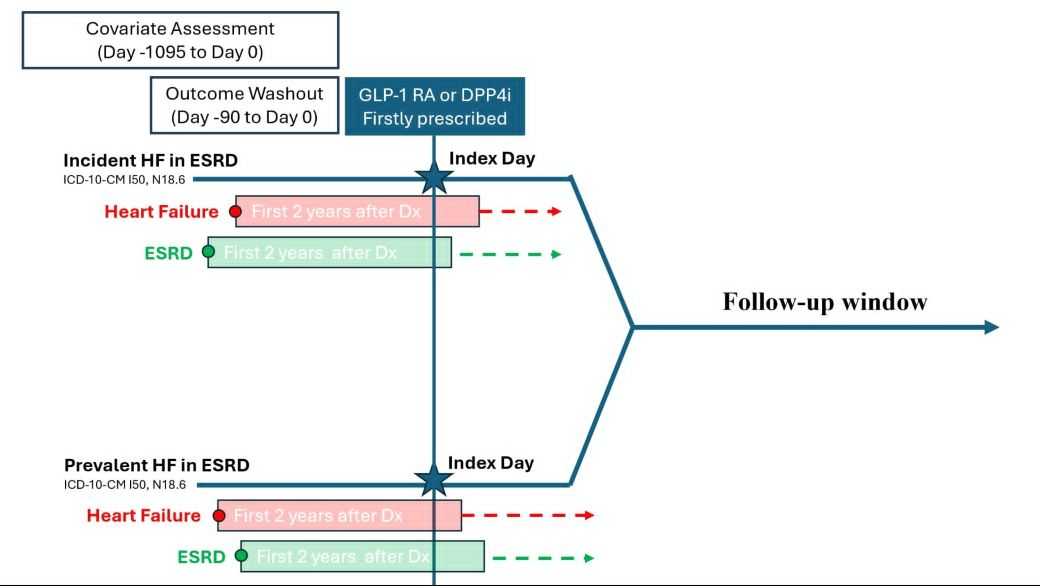


**Supplementary Figure 1.** Study design and cohort definition based on the temporal sequence of heart failure and ESRD diagnoses

Patients with both type 2 diabetes mellitus (T2DM) and end-stage renal disease (ESRD; ICD-10-CM N18.6) were first identified. we enrolled those who also had a diagnosis of heart failure (HF), including **prevalent HF** (HF diagnosed before ESRD) and **incident HF** (HF diagnosed after ESRD). The index date was defined as the date when GLP-1 receptor agonists (GLP-1 RA) or dipeptidyl peptidase-4 inhibitors (DPP-4i) were first prescribed after the presence of both HF and ESRD diagnoses. Baseline covariates were assessed within 1095 days before the index date, and outcomes were observed after a 90-day washout period. Only **new users**—defined as patients who first initiated the study medication after having both a newly diagnosed HF (within 2 years) and newly established ESRD (within 2 years)—were included in the final enrollment cohort.

Abbreviations: HF heart failure, ESRD end-stage renal disease, DPP-4i dipeptidyl peptidase-4 inhibitor, GLP-1 RA glucagon-like peptide-1 receptor agonist

**
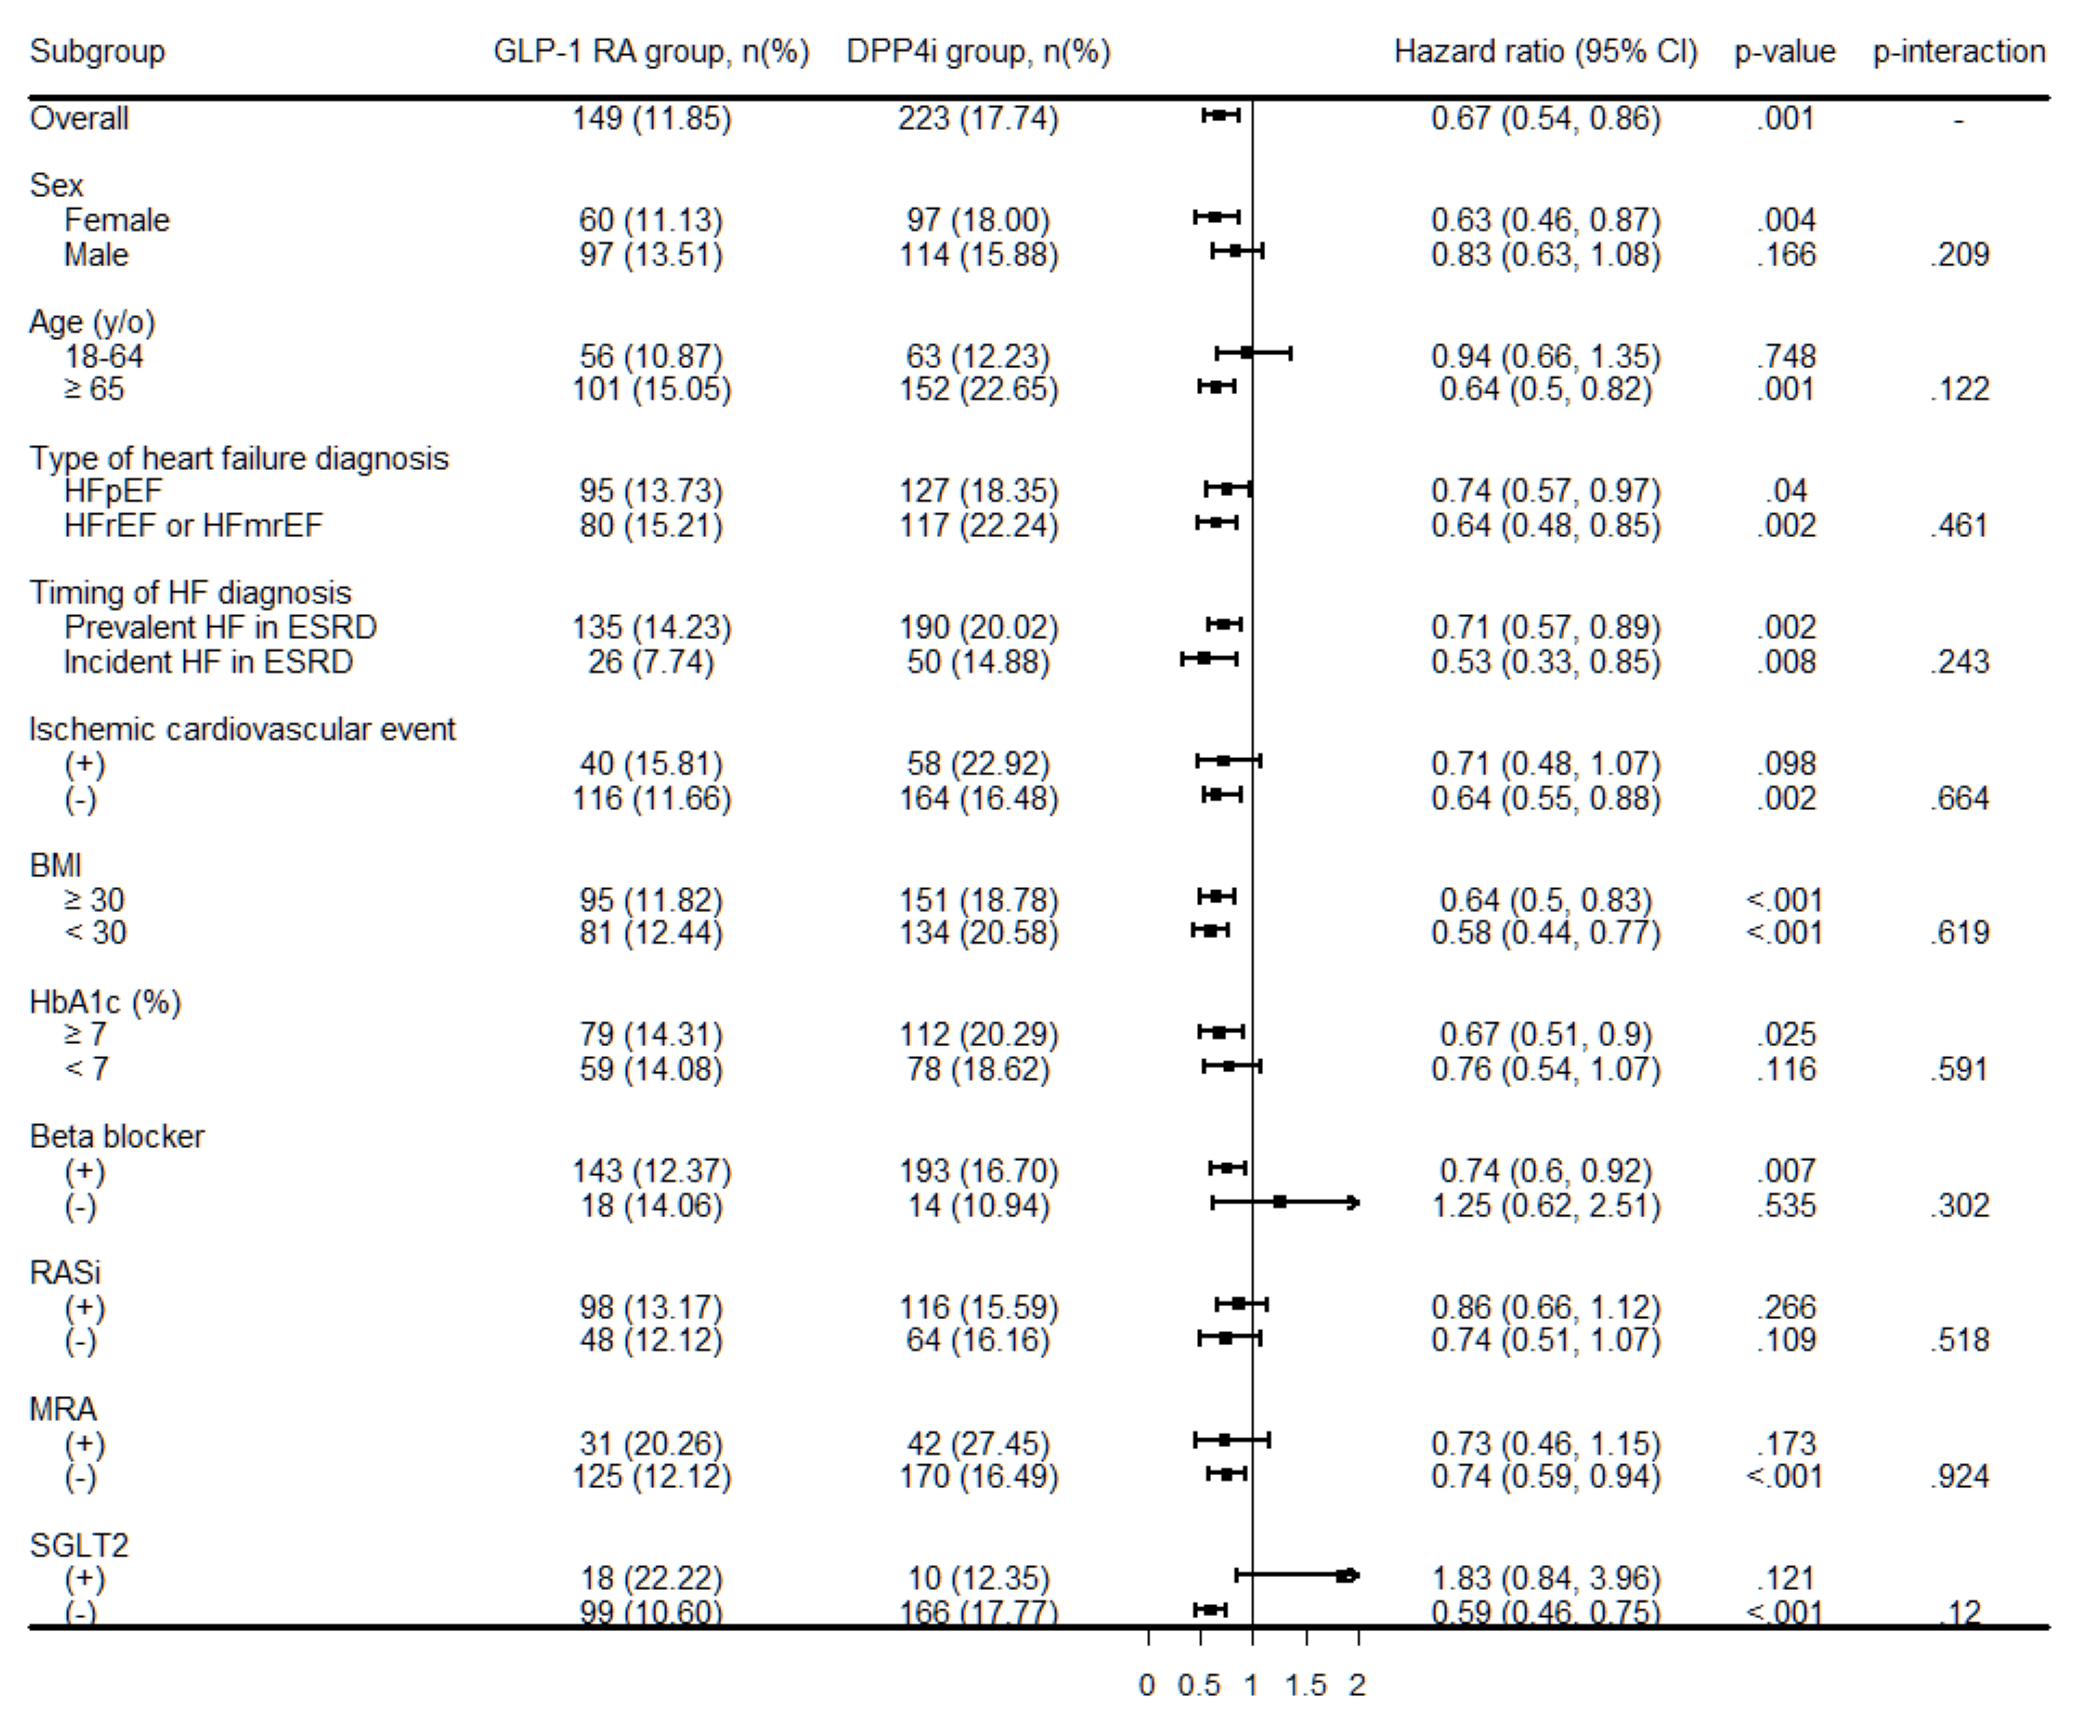
**

**Supplementary Figure 2.** Subgroup analysis of all-cause mortality

Abbreviations: BMI body mass index, DPP-4i dipeptidyl peptidase-4 inhibitor, GLP-1 RA glucagon-like peptide-1 receptor agonist, HbA1c glycated hemoglobin, HFmrEF heart failure with mildly reduced ejection fraction, HFpEF heart failure with preserved ejection fraction, HFrEF heart failure with reduced ejection fraction, MRA mineralocorticoid receptor antagonist, RASi renin–angiotensin system inhibitor, SGLT2i sodium–glucose co-transporter 2 inhibitor, y/o years old.


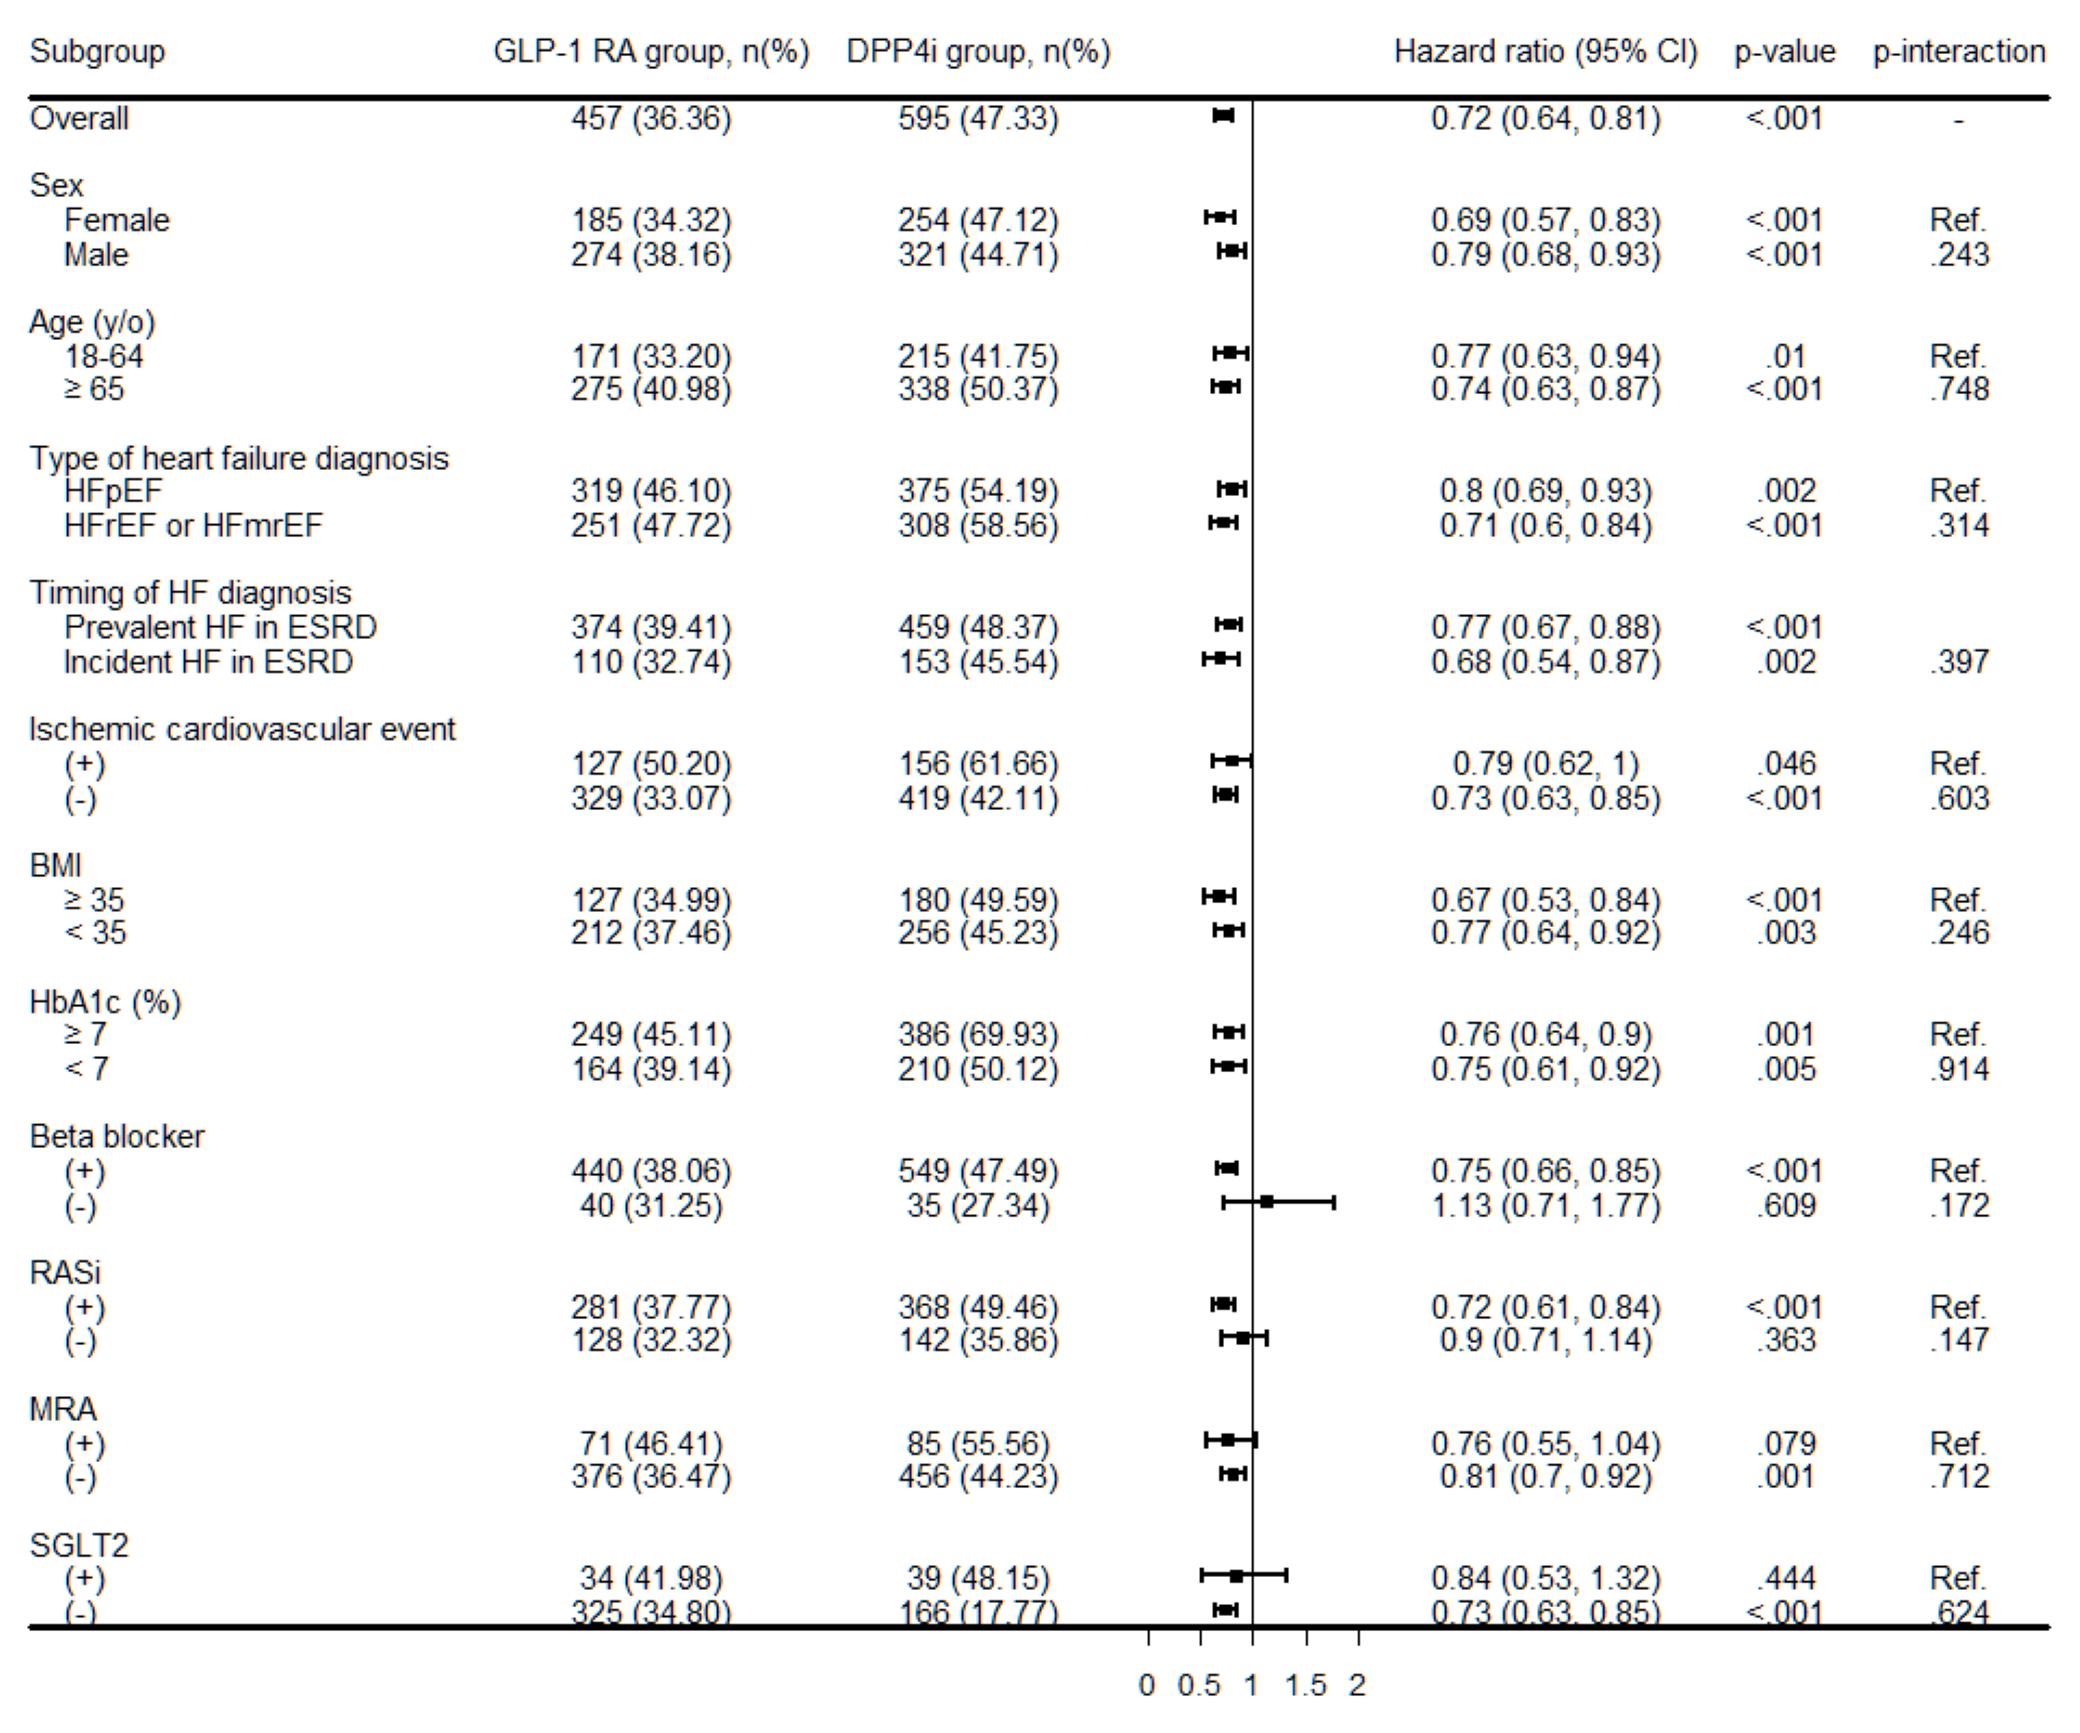


**Supplementary Figure 3.** Subgroup analysis of composite ischemic cardiovascular, heart failure exacerbation events and all-cause mortality (competing risk analysis)

Abbreviations: BMI body mass index, DPP-4i dipeptidyl peptidase-4 inhibitor, GLP-1 RA glucagon-like peptide-1 receptor agonist, HbA1c glycated hemoglobin, HFmrEF heart failure with mildly reduced ejection fraction, HFpEF heart failure with preserved ejection fraction, HFrEF heart failure with reduced ejection fraction, MRA mineralocorticoid receptor antagonist, RASi renin–angiotensin system inhibitor, SGLT2i sodium–glucose co-transporter 2 inhibitor, y/o years old.
